# Supplementary material for: Monoplacophoran mitochondrial genomes: convergent gene arrangements and little phylogenetic signal
Source: PubMed Central journal article supplement (PMC5162086; doi:10.1186/s12862-016-0829-3), 2016-12-16
Supplement: 12862_2016_829_MOESM2_ESM.pdf [file 12862_2016_829_MOESM2_ESM.pdf]

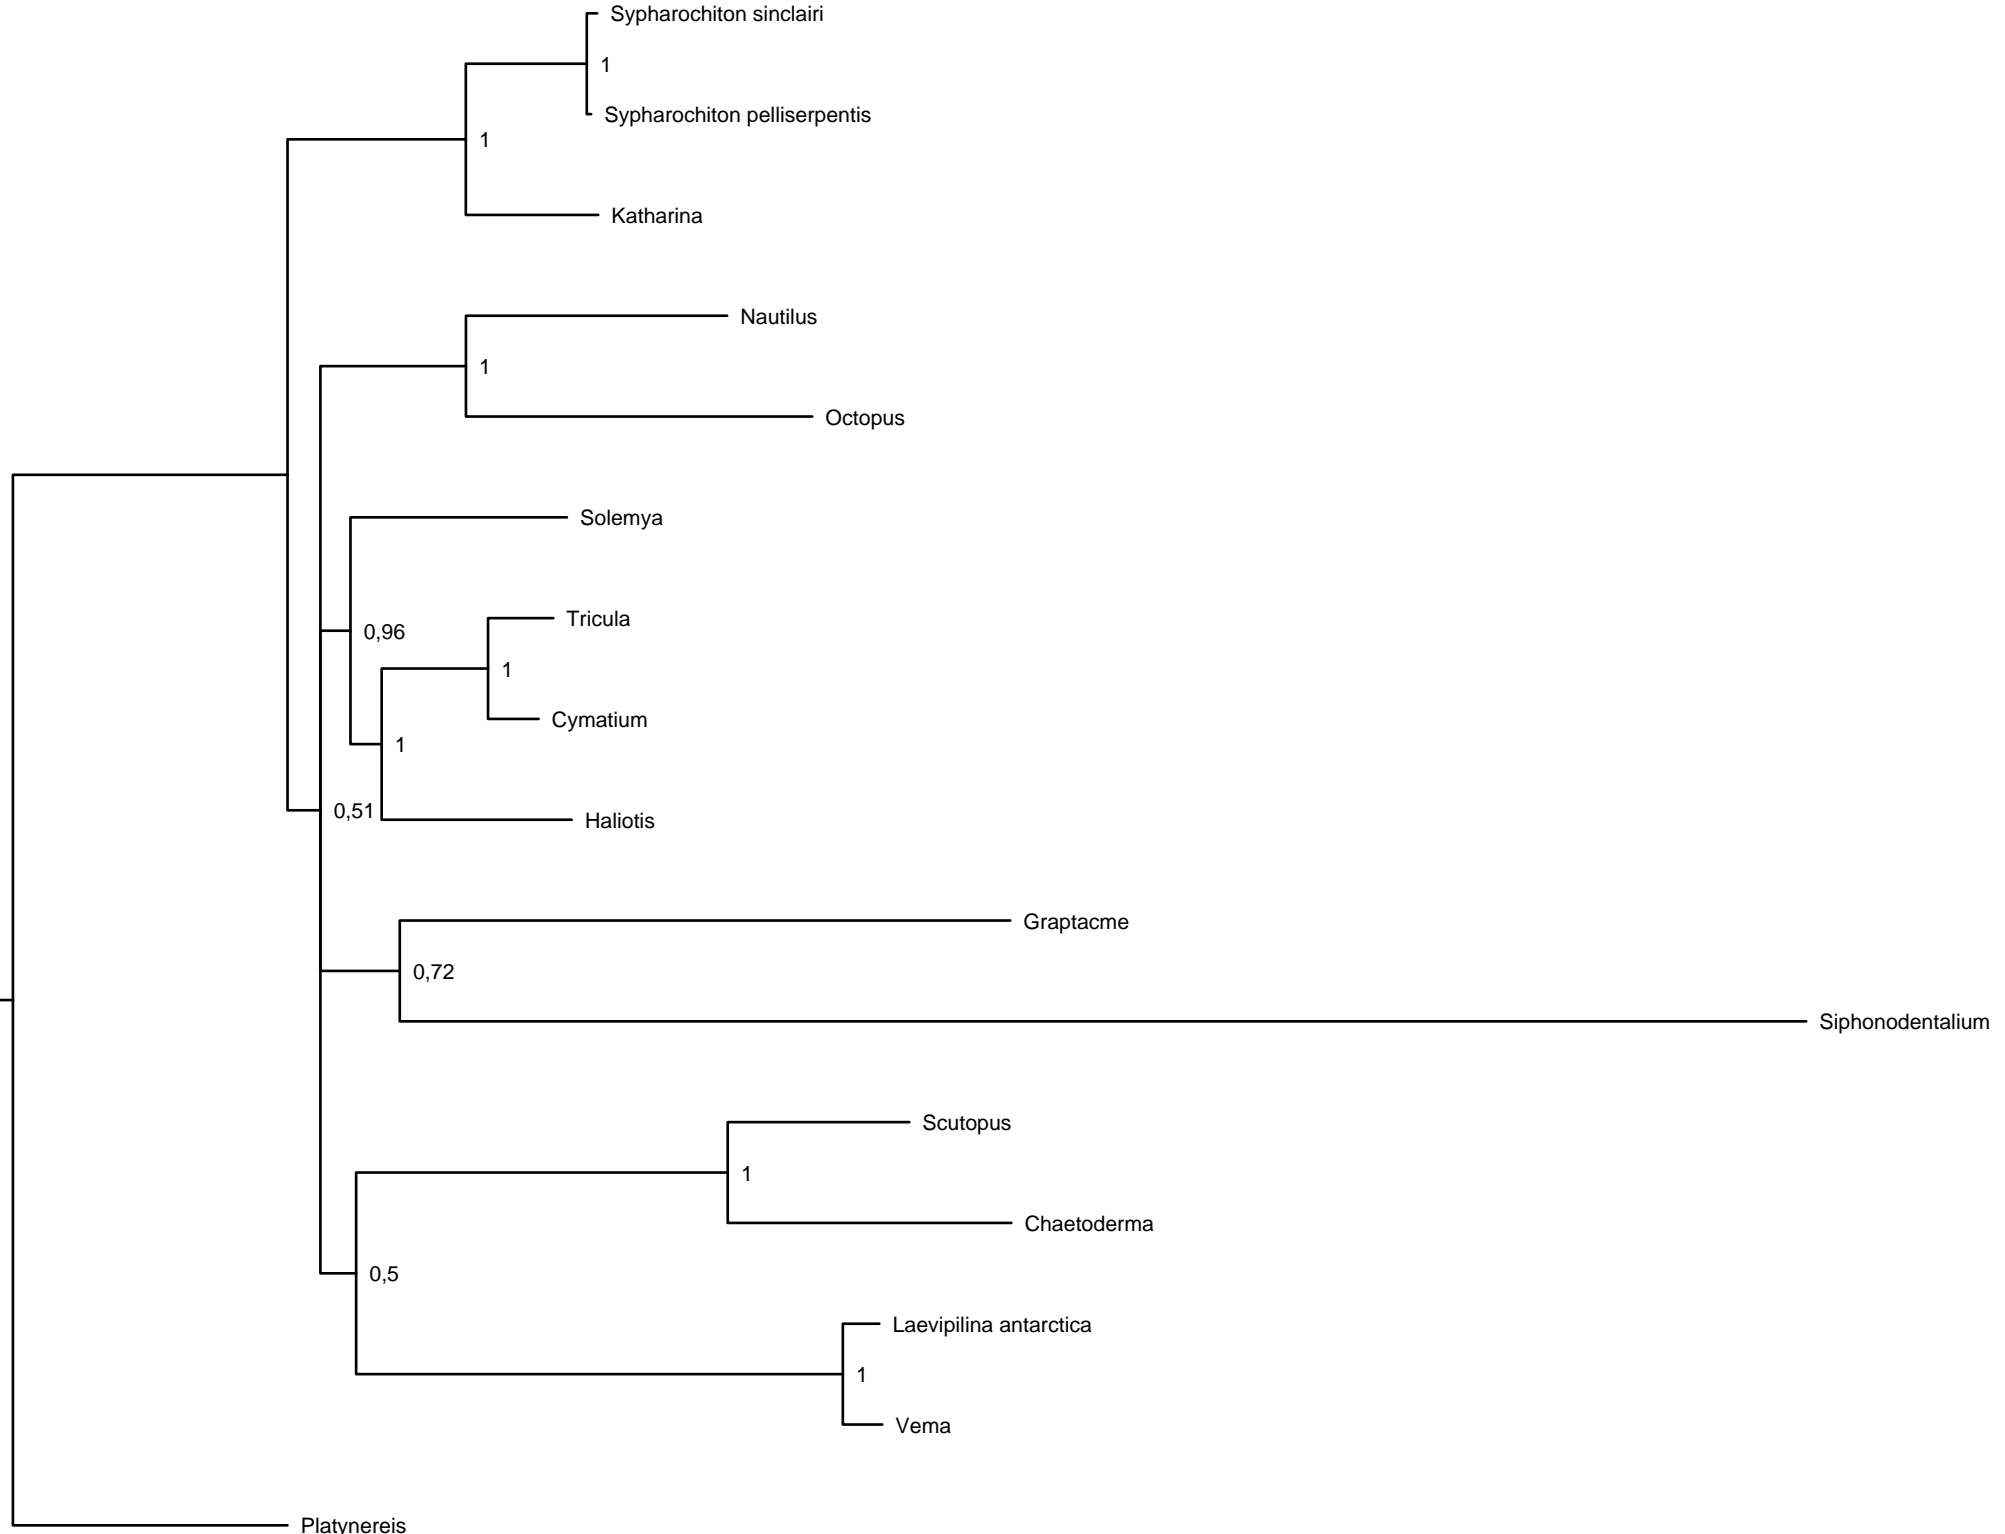

1.0
